# Supplementary material
Source: PubMed Central journal article supplement (PMC5427173)
Supplement: NIHMS68210-supplement-Supplementary_data.pdf [file NIHMS68210-supplement-Supplementary_data.pdf]

## Supporting Information

### **Maternal caffeine intake during pregnancy, early growth and body fat distribution at school-age. The Generation R Study**

*Running title: Maternal caffeine intake and childhood body fat*

Ellis Voerman BSc, Vincent WV Jaddoe MD, PhD, Olta Gishti MD, PhD, Albert Hofman MD, PhD,

Oscar H. Franco MD, PhD, Romy Gaillard PhD

From the Generation R Study Group (EV, VWVJ, OG, RG), the Department of Epidemiology (EV, VWVJ, OG, AH, OHF, RG) and the Department of Pediatrics (EV, VWVJ, OG, RG) of the Erasmus University Medical Center, Rotterdam, The Netherlands

**Address reprint requests and correspondence to:** Romy Gaillard, PhD. The Generation R Study Group (Room Na-2915). Erasmus MC, University Medical Center, PO Box 2040, 3000 CA Rotterdam, The Netherlands. e-mail: [r.gaillard@erasmusmc.nl](mailto:r.gaillard@erasmusmc.nl); phone: +31 10 70 43405; fax: +31 10 70 44645

#### **Content:**

|            |                                                                                                                |
|------------|----------------------------------------------------------------------------------------------------------------|
| Methods S1 | Unbalanced repeated measurement regression models                                                              |
| Table S1   | Infant and childhood growth characteristics                                                                    |
| Table S2   | Correlation coefficients between childhood body fat measures and insulin and c-peptide levels                  |
| Table S3   | Non-response analysis at baseline                                                                              |
| Table S4   | Non-response analysis at follow-up measurement                                                                 |
| Table S5   | Maternal caffeine intake during pregnancy and childhood body fat distribution at 6 years (basic models)        |
| Table S6   | Maternal caffeine intake during pregnancy and childhood overweight at 6 years                                  |
| Table S7   | Maternal caffeine intake during pregnancy and childhood insulin and c-peptide levels at 6 years (basic models) |

## Supporting Information Methods S1 Unbalanced repeated measurement regression models

We used unbalanced repeated measurement regression models to analyze the infant and childhood growth patterns among children whose mothers consumed 2-3.9, 4-5.9 and  $\geq 6$  units of caffeine per day during their pregnancy, as compared to children whose mothers consumed  $< 2$  units of caffeine per day. These models allow for incomplete outcome data and take the correlation between repeated measurements of the same subject into account by modelling the correlated errors of these measurements (1, 2). To model the correlated errors, a compound symmetry covariance structure was assumed. The models can be written as:

$$\text{Height (SDS)} = \beta_0 + \beta_1 \times \text{caffeine intake category} + \beta_2 \times \text{age} + \beta_3 \times \text{caffeine intake category} \\ \times \text{age}$$

$$\text{Weight (SDS)} = \beta_0 + \beta_1 \times \text{caffeine intake category} + \beta_2 \times \text{age} + \beta_3 \times \text{caffeine intake category} \\ \times \text{age}$$

$$\text{Body mass index (SDS)} = \beta_0 + \beta_1 \times \text{caffeine intake category} + \beta_2 \times \text{age} + \beta_3 \times \text{caffeine intake} \\ \text{category} \times \text{age}$$

In these models, ' $\beta_0 + \beta_1 \times \text{caffeine intake category}$ ' reflects the intercept. The intercept reflects the mean growth characteristic value in SDS for each caffeine intake category. The term ' $\beta_2 \times \text{age}$ ' reflects the change in growth characteristics per month. The term ' $\beta_3 \times \text{caffeine intake category} \times \text{age}$ ', reflects the difference in change in growth characteristics per month between the different caffeine intake categories.

### References:

1. Goldstein H. Multilevel Statistical Methods. 2nd edn. London: Edward Arnold; 1995.
2. Royston P, Ambler G, Sauerbrei W. The use of fractional polynomials to model continuous risk variables in epidemiology. *Int J Epidemiol* 1999;28:964–74.

**Supporting Information Table S1 Childhood growth characteristics (N=7,857)<sup>1</sup>**

|                                                        | Maternal caffeine intake during pregnancy <sup>2</sup> |                      |                         |                      |                   | P-value <sup>3</sup> |
|--------------------------------------------------------|--------------------------------------------------------|----------------------|-------------------------|----------------------|-------------------|----------------------|
|                                                        | Total group<br>N=7,857                                 | < 2 units<br>N=4,804 | 2 -3.9 units<br>N=2,447 | 4-5.9 units<br>N=496 | >6 units<br>N=110 |                      |
| <b>Birth</b>                                           |                                                        |                      |                         |                      |                   |                      |
| Gestational age at birth, median (95% range), weeks    | 40.1 (35.7, 42.3)                                      | 40.1 (35.6, 42.3)    | 40.1 (36.0, 42.3)       | 40.3 (33.3, 42.4)    | 40.2 (33.3, 42.5) | 0.001                |
| Birth length, mean (SD), cm                            | 50.2 (2.4)                                             | 50.2 (2.4)           | 50.2 (2.4)              | 50.3 (2.2)           | 50.6 (2.5)        | 0.216                |
| Birth weight, median (95% range), g                    | 3435 (2242, 4490)                                      | 3420 (2250, 4450)    | 3460 (2260, 4520)       | 3490 (2144, 4567)    | 3380 (1980, 4300) | <0.001               |
| <b>6 months</b>                                        |                                                        |                      |                         |                      |                   |                      |
| Age at follow-up, median (95% range), months           | 6.2 (5.2, 8.3)                                         | 6.2 (5.2, 8.3)       | 6.2 (5.2, 8.3)          | 6.2 (5.3, 8.1)       | 6.2 (5.3, 9.4)    | 0.530                |
| Length, mean (SD), cm                                  | 67.6 (2.7)                                             | 67.7 (2.7)           | 67.6 (2.7)              | 67.8 (2.7)           | 67.2 (2.4)        | 0.375                |
| Weight, median (95% range), kg                         | 7.9 (6.2, 9.8)                                         | 7.9 (6.2, 9.8)       | 7.8 (6.2, 9.8)          | 7.8 (6.3, 10.0)      | 7.8 (6.4, 9.8)    | 0.110                |
| Body mass index, median (95% range), kg/m <sup>2</sup> | 17.2 (14.7, 20.3)                                      | 17.2 (14.7, 20.3)    | 17.1 (14.7, 20.3)       | 17.2 (14.4, 20.4)    | 17.6 (15.1, 20.0) | 0.012                |
| <b>12 months</b>                                       |                                                        |                      |                         |                      |                   |                      |
| Age at follow-up, median (95% range), months           | 11.1 (10.1, 12.5)                                      | 11.1 (10.1, 12.6)    | 11.1 (10.1, 12.5)       | 11.1 (10.2, 12.5)    | 11.1 (10.0, 12.7) | 0.705                |
| Length, mean (SD), cm                                  | 74.4 (2.7)                                             | 74.4 (2.7)           | 74.3 (2.6)              | 74.5 (2.9)           | 74.1 (2.7)        | 0.329                |
| Weight, median (95% range), kg                         | 9.6 (7.7, 12.0)                                        | 9.7 (7.6, 11.9)      | 9.6 (7.6, 11.9)         | 9.6 (7.7, 12.4)      | 9.5 (7.9, 12.1)   | 0.672                |
| Body mass index, median (95% range), kg/m <sup>2</sup> | 17.4 (14.9, 20.3)                                      | 17.4 (14.9, 20.2)    | 17.4 (14.9, 20.5)       | 17.4 (14.6, 20.6)    | 17.4 (15.3, 20.7) | 0.959                |
| <b>24 months</b>                                       |                                                        |                      |                         |                      |                   |                      |
| Age at follow-up, median (95% range), months           | 25.0 (23.4, 31.4)                                      | 25.0 (23.4, 31.2)    | 24.9 (23.4, 31.4)       | 25.1 (23.5, 31.7)    | 24.6 (23.4, 30.4) | 0.374                |
| Height, mean (SD), cm                                  | 88.7 (3.8)                                             | 88.8 (3.8)           | 88.6 (3.7)              | 88.9 (4.0)           | 88.2 (3.2)        | 0.216                |
| Weight, median (95% range), kg                         | 12.9 (10.3, 16.5)                                      | 12.9 (10.3, 16.5)    | 12.9 (10.3, 16.6)       | 13.0 (10.4, 16.3)    | 13.2 (9.7, 16.1)  | 0.924                |
| Body mass index, median (95% range), kg/m <sup>2</sup> | 16.5 (14.1, 19.6)                                      | 16.5 (14.0, 19.5)    | 16.5 (14.1, 20.0)       | 16.6 (14.1, 18.9)    | 16.8 (13.9, 19.0) | 0.296                |

---

|                                                                   |                   |                   |                   |                   |                   |       |
|-------------------------------------------------------------------|-------------------|-------------------|-------------------|-------------------|-------------------|-------|
| <b>36 months</b>                                                  |                   |                   |                   |                   |                   |       |
| Age at follow-up, median (95% range), months                      | 36.7 (35.4, 40.8) | 36.7 (35.3, 40.8) | 36.7 (35.4, 40.8) | 36.7 (35.4, 40.8) | 36.7 (35.2, 41.5) | 0.997 |
| Height, mean (SD), cm                                             | 97.4 (3.8)        | 97.4 (3.8)        | 97.4 (3.8)        | 97.5 (3.8)        | 97.1 (3.4)        | 0.833 |
| Weight, median (95% range), kg                                    | 15.1 (12.0, 19.5) | 15.0 (12.0, 19.5) | 15.1 (12.1, 19.5) | 15.3 (12.3, 19.0) | 15.5 (12.2, 21.7) | 0.549 |
| Body mass index, median (95% range), kg/m <sup>2</sup>            | 15.9 (13.7, 19.0) | 15.9 (13.7, 19.0) | 15.9 (13.8, 19.1) | 16.0 (14.0, 18.8) | 16.6 (14.2, 20.8) | 0.149 |
| <b>48 months</b>                                                  |                   |                   |                   |                   |                   |       |
| Age at follow-up, median (95% range), months                      | 45.8 (44.4, 48.6) | 45.8 (44.5, 48.7) | 45.8 (44.4, 48.4) | 45.9 (44.4, 48.7) | 46.0 (44.3, 49.1) | 0.807 |
| Height, mean (SD), cm                                             | 103.2 (4.2)       | 103.2 (4.2)       | 103.2 (4.3)       | 103.3 (4.2)       | 103.1 (3.9)       | 0.986 |
| Weight, median (95% range), kg                                    | 16.7 (13.3, 22.1) | 16.7 (13.2, 22.2) | 16.7 (13.3, 22.1) | 17.0 (13.3, 21.4) | 17.3 (12.8, 25.7) | 0.269 |
| Body mass index, median (95% range), kg/m <sup>2</sup>            | 15.7 (13.6, 19.2) | 15.7 (13.5, 19.3) | 15.7 (13.5, 19.9) | 15.9 (13.8, 19.0) | 16.1 (14.0, 20.8) | 0.068 |
| <b>72 months</b>                                                  |                   |                   |                   |                   |                   |       |
| Age at follow-up, median (95% range), months                      | 72.6 (67.8, 95.6) | 72.7 (67.9, 96.9) | 72.5 (67.6, 93.3) | 72.6 (66.7, 88.8) | 73.0 (67.7, 90.7) | 0.042 |
| Height, mean (SD), cm                                             | 119.5 (6.0)       | 119.5 (6.2)       | 119.5 (5.9)       | 119.5 (5.9)       | 119.1 (5.1)       | 0.960 |
| Weight, median (95% range), kg                                    | 22.6 (17.4, 34.2) | 22.6 (14.4, 34.4) | 22.4 (17.6, 33.8) | 22.8 (17.8, 33.8) | 22.8 (16.8, 34.2) | 0.071 |
| Body mass index at 6 years, median (95% range), kg/m <sup>2</sup> | 15.9 (13.6, 21.3) | 15.9 (13.6, 21.3) | 15.7 (13.7, 20.9) | 16.0 (13.8, 21.4) | 16.2 (13.9, 21.0) | 0.001 |

---

<sup>1</sup>Values represent means (SD), median (95% range) or number of subjects (valid %). <sup>2</sup>1 unit of caffeine intake represents the equivalent of 1 cup of coffee (90 mg caffeine).

<sup>3</sup>Differences in subject characteristics between the groups were tested using One-Way ANOVA for continuous variables and Chi-square tests for proportions.

**Supporting Information Table S2 Correlation coefficients between childhood body fat measures and insulin and c-peptide levels (N=5,562)<sup>1</sup>**

| <i>Spearman r<sub>s</sub></i>        | Body mass index | Total body fat mass | Android/gynoid fat mass ratio | Preperitoneal fat area | Insulin         | C-peptide       |
|--------------------------------------|-----------------|---------------------|-------------------------------|------------------------|-----------------|-----------------|
| <b>Body mass index</b>               | 1               | 0.57<br>P<0.001     | 0.47<br>P<0.001               | 0.42<br>P<0.001        | 0.13<br>P<0.001 | 0.09<br>P<0.001 |
| <b>Total body fat mass</b>           | 0.57<br>P<0.001 | 1                   | 0.55<br>P<0.001               | 0.55<br>P<0.001        | 0.09<br>P<0.001 | 0.06<br>P=0.001 |
| <b>Android/gynoid fat mass ratio</b> | 0.47<br>P<0.001 | 0.55<br>P<0.001     | 1                             | 0.40<br>P<0.001        | 0.09<br>P<0.001 | 0.08<br>P<0.001 |
| <b>Preperitoneal fat area</b>        | 0.42<br>P<0.001 | 0.55<br>P<0.001     | 0.40<br>P<0.001               | 1                      | 0.09<br>P<0.001 | 0.06<br>P=0.001 |
| <b>Insulin</b>                       | 0.13<br>P<0.001 | 0.09<br>P<0.001     | 0.09<br>P<0.001               | 0.09<br>P<0.001        | 1               | 0.88<br>P<0.001 |
| <b>C-peptide</b>                     | 0.09<br>P<0.001 | 0.06<br>P=0.001     | 0.08<br>P<0.001               | 0.06<br>P=0.001        | 0.88<br>P<0.001 | 1               |

<sup>1</sup>Values are correlation coefficients using Spearman's rho tests for skewed variables.

**Supporting Information Table S3 Non-response analysis at baseline (N=8,879)<sup>1</sup>**

|                                                                      | <b>Maternal caffeine intake during pregnancy available</b> | <b>Excluded because of missing information on maternal caffeine intake during pregnancy</b> | <b>P-value<sup>2</sup></b> |
|----------------------------------------------------------------------|------------------------------------------------------------|---------------------------------------------------------------------------------------------|----------------------------|
|                                                                      | <b>N= 8,099</b>                                            | <b>N= 780</b>                                                                               |                            |
| <b>Maternal characteristics</b>                                      |                                                            |                                                                                             |                            |
| Age, median (95% range), years                                       | 30.4 (19.3, 39.3)                                          | 28.4 (18.7, 39.3)                                                                           | <0.001                     |
| Height, mean (SD), cm                                                | 167.4 (7.4)                                                | 164.3 (7.3)                                                                                 | <0.001                     |
| Pre-pregnancy weight, median (95% range), kg                         | 64.0 (48.0, 99.0)                                          | 63.0 (46.6, 100.0)                                                                          | 0.418                      |
| Pre-pregnancy body mass index, median (95% range), kg/m <sup>2</sup> | 22.6 (17.9, 35.0)                                          | 23.3 (17.6, 35.6)                                                                           | 0.048                      |
| Education, No. (%)                                                   |                                                            |                                                                                             |                            |
| Primary                                                              | 436 (6.0)                                                  | 47 (14.1)                                                                                   | <0.001                     |
| Secondary                                                            | 3160 (43.2)                                                | 179 (53.6)                                                                                  |                            |
| Higher                                                               | 3712(50.8)                                                 | 108 (32.3)                                                                                  |                            |
| Parity, No. nulliparous (%)                                          | 4536 (56.4)                                                | 386 (54.3)                                                                                  | 0.001                      |
| Ethnicity, No. European (%)                                          | 4618 (58.4)                                                | 150 (31.5)                                                                                  | <0.001                     |
| Folic acid supplementation use, No. Yes (%)                          | 4504 (71.2)                                                | 128 (53.8)                                                                                  | <0.001                     |
| Smoking during pregnancy, No. Yes (%)                                | 1381 (18.6)                                                | 59 (18.6)                                                                                   | 0.997                      |
| Alcohol consumption during pregnancy, No. Yes (%)                    | 2737 (37.3)                                                | 49 (16.1)                                                                                   | <0.001                     |
| Gestational diabetes, No. Yes (%)                                    | 82 (1.1)                                                   | 9 (1.3)                                                                                     | 0.600                      |
| Pre-eclampsia, No. Yes (%)                                           | 169 (2.3)                                                  | 18 (2.5)                                                                                    | 0.633                      |
| Gestational hypertension, No. Yes (%)                                | 301 (4.0)                                                  | 17 (2.4)                                                                                    | 0.039                      |
| <b>Child characteristics</b>                                         |                                                            |                                                                                             |                            |
| Males, No. (%)                                                       | 4024 (50.4)                                                | 377 (51.3)                                                                                  | 0.627                      |
| Birth weight, median (95% range), g                                  | 3425 (2200, 4482)                                          | 3340 (1948, 4460)                                                                           | <0.001                     |
| Gestational age at birth, median (95% range), weeks                  | 40.1 (35.4, 42.3)                                          | 40.0 (32.3, 42.4)                                                                           | <0.001                     |
| Ever breastfeeding, No. Yes (%)                                      | 5336 (91.9)                                                | 275 (95.5)                                                                                  | 0.028                      |
| Introduction of solid foods, No. before 6 months (%)                 | 3899 (89.4)                                                | 123 (89.8)                                                                                  | 0.900                      |

<sup>1</sup>Values represent means (SD), median (95% range) or number of subjects (valid %). <sup>2</sup>Differences in subject characteristics between the groups were tested using Independent Samples T-tests for continuous variables and Chi-square tests for proportions.

**Supporting Information Table S4 Non-response analysis at follow-up measurement (N=7,902)<sup>1</sup>**

|                                                                      | Follow-up at 6 years<br>N= 5,562 | Lost to follow-up at<br>6 years<br>N= 2,340 | P-value <sup>2</sup> |
|----------------------------------------------------------------------|----------------------------------|---------------------------------------------|----------------------|
| <b>Maternal characteristics</b>                                      |                                  |                                             |                      |
| Age, median (95% range), years                                       | 30.9 (19.8, 39.4)                | 28.8 (18.5, 38.5)                           | <0.001               |
| Height, mean (SD), cm                                                | 167.7 (7.4)                      | 166.6 (7.3)                                 | <0.001               |
| Pre-pregnancy weight, median (95% range), kg                         | 64.0 (49.0, 98.0)                | 63.0 (47.0, 100.0)                          | 0.145                |
| Pre-pregnancy body mass index, median (95% range), kg/m <sup>2</sup> | 22.6 (18.1, 34.6)                | 22.6 (17.7, 35.6)                           | 0.300                |
| Caffeine intake during pregnancy, median (95% range), units          | 1.5 (0, 5.0)                     | 1.3 (0, 5.0)                                | <0.001               |
| Caffeine intake during pregnancy, No. (%)                            |                                  |                                             |                      |
| <2 units                                                             | 3,295 (59.2)                     | 1,545 (66.0)                                | <0.001               |
| 2 – 3.9 units                                                        | 1,819 (32.7)                     | 635 (27.1)                                  |                      |
| 4 – 5.9 units                                                        | 368 (6.6)                        | 130 (5.6)                                   |                      |
| ≥ 6 units                                                            | 80 (1.4)                         | 30 (1.3)                                    |                      |
| Education, No. (%)                                                   |                                  |                                             |                      |
| Primary                                                              | 272 (5.4)                        | 152 (7.2)                                   | <0.001               |
| Secondary                                                            | 1,976 (39.3)                     | 1,116 (53.1)                                |                      |
| Higher                                                               | 2,780(55.3)                      | 833 (39.6)                                  |                      |
| Parity, No. nulliparous (%)                                          | 3,195 (57.7)                     | 1,238 (53.5)                                | 0.001                |
| Ethnicity, No. European (%)                                          | 3,412 (62.1)                     | 1,091 (49.2)                                | <0.001               |
| Folic acid supplementation use, No. Yes (%)                          | 3,287(75.2)                      | 1,105 (61.6)                                | <0.001               |
| Smoking during pregnancy, No. Yes (%)                                | 871 (17.1)                       | 478 (22.2)                                  | <0.001               |
| Alcohol consumption during pregnancy, No. Yes (%)                    | 2,056 (40.9)                     | 630 (29.6)                                  | <0.001               |
| Gestational diabetes, No. Yes (%)                                    | 55 (1.0)                         | 25 (1.1)                                    | 0.679                |
| Pre-eclampsia, No. Yes (%)                                           | 99 (1.9)                         | 55 (2.6)                                    | 0.082                |
| Gestational hypertension, No. Yes (%)                                | 228 (4.3)                        | 66 (3.1)                                    | 0.012                |
| <b>Child characteristics</b>                                         |                                  |                                             |                      |
| Males, No. (%)                                                       | 2,772 (49.8)                     | 1,207 (51.6)                                | 0.147                |
| Birth weight, median (95% range), g                                  | 3,450 (2260, 4460)               | 3,400 (2205, 4528)                          | 0.002                |
| Gestational age at birth, median (95% range), weeks                  | 40.1 (35.9, 42.3)                | 40.0 (35.0, 42.4)                           | <0.001               |
| Ever breastfeeding, No. Yes (%)                                      | 4,114 (92.5)                     | 1,168 (90.1)                                | 0.005                |
| Introduction of solid foods, No. before 6 months (%)                 | 3,105 (89.4)                     | 755 (89.8)                                  | 0.754                |

<sup>1</sup>Values represent means (SD), median (95% range) or number of subjects (valid %). <sup>2</sup>Differences in subject characteristics between the groups were tested using Independent Samples T-tests for continuous variables and Chi-square tests for proportions .

**Supporting Information Table S5 Maternal caffeine intake during pregnancy and childhood body fat distribution at 6 years (basic models) (N=5,562)**

|                                            | Body mass index (SDS)            | Total body fat mass (SDS)         | Android/gynoid fat mass ratio (SDS) | Abdominal preperitoneal fat area (SDS) |
|--------------------------------------------|----------------------------------|-----------------------------------|-------------------------------------|----------------------------------------|
|                                            | N=5,562                          | N=5,407                           | N=5,405                             | N=4,508                                |
| <b>Maternal caffeine intake categories</b> |                                  |                                   |                                     |                                        |
| < 2 units                                  | Reference<br>N=3,295             | Reference<br>N=3,199              | Reference<br>N=3,197                | Reference<br>N=2,658                   |
| 2 -3.9 units                               | -0.10 (-0.15, -0.04)*<br>N=1,819 | -0.08 (-0.13, -0.03)*<br>N= 1,771 | -0.02 (-0.08, 0.04)<br>N=1,771      | -0.12 (-0.18, -0.06)*<br>N=1,475       |
| 4- 5.9 units                               | 0.03 (-0.08, 0.13)<br>N= 368     | -0.01 (-0.11, 0.09)<br>N=357      | -0.04 (-0.15, 0.07)<br>N=357        | -0.13 (-0.24, -0.02)*<br>N=306         |
| ≥ 6 units                                  | 0.08 (-0.13, 0.29)<br>N=80       | 0.09 (-0.11, 0.29)<br>N=80        | 0.24 (0.02, 0.46)*<br>N=80          | -0.23 (-0.45, 0)*<br>N=69              |
| <b>P-value for trend</b>                   | 0.245                            | 0.202                             | 0.852                               | <0.001                                 |

Values are regression coefficients (95% confidence interval) that reflect the difference in childhood outcomes in children whose mothers consumed 2-3.9, 4-5.9 and ≥6 units of caffeine per day during pregnancy, respectively, as compared to those whose mothers consumed <2 units of caffeine per day. 1 unit of caffeine intake represents the equivalent of 1 cup of coffee (90 mg caffeine). The models were adjusted for child's sex, age at follow-up measurement and height at follow-up measurement (fat mass outcomes only). P-values for trend were obtained from models in which the categorized caffeine intake variable was entered as continuous variable. \*P-value <0.05.



**Supporting Information Table S6 Maternal caffeine intake during pregnancy and childhood overweight at 6 years (N=5,562)**

| <b>Maternal caffeine intake categories</b> | <b>Odds Ratio<br/>(95% Confidence Interval)</b> |
|--------------------------------------------|-------------------------------------------------|
| < 2 units                                  | Reference<br><i>N</i> =3,295                    |
| 2 -3.9 units                               | 0.91 (0.77, 1.08)<br><i>N</i> =1,819            |
| 4 – 5.9 units                              | 1.09 (0.80, 1.49)<br><i>N</i> =368              |
| ≥ 6 units                                  | 1.25 (0.68, 2.30)<br><i>N</i> =80               |
| <b>P-value for trend</b>                   | <b>0.937</b>                                    |

Values are Odds Ratio's (95% confidence interval) that reflect the risk of overweight/obesity in children whose mothers consumed 2-3.9, 4-5.9 and ≥6 units of caffeine per day during pregnancy, respectively, as compared to those whose mothers consumed <2 units of caffeine per day. 1 unit of caffeine intake represents the equivalent of 1 cup of coffee (90 mg caffeine). The model was adjusted for the child's sex, age at follow-up measurement, maternal age, pre-pregnancy body mass index, parity, ethnicity, educational level, folic acid supplementation use, smoking and alcohol consumption during pregnancy, gestational diabetes, gestational hypertensive disorders, birth weight, gestational age at birth, breastfeeding, timing of introduction of solid foods and television-watching time. P-values for trend were obtained from models in which the categorized caffeine intake variable was entered as continuous variable.

**Supporting Information Table S7 Maternal caffeine intake during pregnancy and childhood insulin and c-peptide levels at 6 years (basic models) (N=3,667)**

|                                            | <b>Insulin (SDS)</b>                   | <b>C-peptide (SDS)</b>               |
|--------------------------------------------|----------------------------------------|--------------------------------------|
|                                            | <b>N=3,654</b>                         | <b>N=3,667</b>                       |
| <b>Maternal caffeine intake categories</b> |                                        |                                      |
| < 2 units                                  | Reference<br><i>N=2,116</i>            | Reference<br><i>N=2,128</i>          |
| 2 – 3.9 units                              | -0.02 (-0.09, 0.05)<br><i>N= 1,239</i> | 0.01 (-0.09, 0.06)<br><i>N=1,237</i> |
| 4 – 5.9 units                              | 0.16 (0.02, 0.29)*<br><i>N=241</i>     | 0.16 (0.03, 0.29)*<br><i>N=244</i>   |
| ≥ 6 units                                  | -0.19 (-0.45, 0.07)<br><i>N=58</i>     | -0.10 (-0.36, 0.16)<br><i>N=59</i>   |
| <b>P-value for trend</b>                   | 0.738                                  | 0.415                                |

Values are regression coefficients (95% confidence interval) that reflect the difference in childhood outcomes in children whose mothers consumed 2-3.9, 4-5.9 and ≥6 units of caffeine per day during pregnancy, respectively, as compared to those whose mothers consumed <2 units of caffeine per day. 1 unit of caffeine intake represents the equivalent of 1 cup of coffee (90 mg caffeine). The models were adjusted for child's sex and age at follow-up measurement. P-values for trend were obtained from models in which the categorized caffeine intake variable was entered as continuous variable. \*P-value <0.05.
